# Supplementary material
Source: PubMed Central journal article supplement (PMC9112888)
Supplement: aac.00139-22-s0001.pdf [file aac.00139-22-s0001.pdf]

1 **TABLE S1** Cumulative MIC distributions for colistin tested against the main species and organism groups

| Species/organism group (no. of isolates)                                            | No. and cumulative % of isolates inhibited at MIC (mg/L) of: |          |             |             |             |             |            |           |            |           |           | MIC <sub>50</sub> | MIC <sub>90</sub> |                |
|-------------------------------------------------------------------------------------|--------------------------------------------------------------|----------|-------------|-------------|-------------|-------------|------------|-----------|------------|-----------|-----------|-------------------|-------------------|----------------|
|                                                                                     | ≤0.03                                                        | 0.06     | 0.12        | 0.25        | 0.5         | 1           | 2          | 4         | 8          | 16        | 32        |                   |                   | > <sup>a</sup> |
| <i>Enterobacteriales</i> (787)                                                      |                                                              |          |             |             |             |             |            |           |            |           |           |                   |                   |                |
| <i>Enterobacteriales</i> not intrinsically resistant to colistin (685) <sup>b</sup> | 0<br>0.0                                                     | 2<br>0.3 | 373<br>54.7 | 246<br>90.7 | 46<br>97.4  | 1<br>97.5   | 0<br>97.5  | 2<br>97.8 | 3<br>98.2  | 2<br>98.5 | 0<br>98.5 | 10<br>100.0       | 0.12              | 0.25           |
| <i>Citrobacter</i> spp. (47)                                                        |                                                              | 0<br>0.0 | 26<br>55.3  | 18<br>93.6  | 3<br>100.0  |             |            |           |            |           |           |                   | 0.12              | 0.25           |
| <i>Enterobacter cloacae</i> species complex (52)                                    | 0<br>0.0                                                     | 1<br>1.9 | 28<br>55.8  | 11<br>76.9  | 2<br>80.8   | 0<br>80.8   | 0<br>80.8  | 0<br>80.8 | 1<br>82.7  | 1<br>84.6 | 0<br>84.6 | 8<br>100.0        | 0.12              | >32            |
| <i>Escherichia coli</i> (261)                                                       | 0<br>0.0                                                     | 1<br>0.4 | 109<br>42.1 | 129<br>91.6 | 20<br>99.2  | 0<br>99.2   | 0<br>99.2  | 1<br>99.6 | 1<br>100.0 |           |           |                   | 0.25              | 0.25           |
| <i>Klebsiella aerogenes</i> (23)                                                    |                                                              | 0<br>0.0 | 17<br>73.9  | 5<br>95.7   | 0<br>95.7   | 1<br>100.0  |            |           |            |           |           |                   | 0.12              | 0.25           |
| <i>Klebsiella oxytoca</i> (37)                                                      |                                                              | 0<br>0.0 | 32<br>86.5  | 2<br>91.9   | 3<br>100.0  |             |            |           |            |           |           |                   | 0.12              | 0.25           |
| <i>Klebsiella pneumoniae</i> (265)                                                  |                                                              | 0<br>0.0 | 161<br>60.8 | 81<br>91.3  | 18<br>98.1  | 0<br>98.1   | 0<br>98.1  | 1<br>98.5 | 1<br>98.9  | 1<br>99.2 | 0<br>99.2 | 2<br>100.0        | 0.12              | 0.25           |
| Colistin-resistant (17)                                                             |                                                              |          |             |             |             |             | 0<br>0.0   | 2<br>11.8 | 3<br>29.4  | 2<br>41.2 | 0<br>41.2 | 10<br>100.0       | >32               | >32            |
| Meropenem-resistant (10)                                                            |                                                              | 0<br>0.0 | 5<br>50.0   | 2<br>70.0   | 0<br>70.0   | 0<br>70.0   | 0<br>70.0  | 1<br>80.0 | 0<br>80.0  | 0<br>80.0 | 0<br>80.0 | 2<br>100.0        | 0.12              | >32            |
| Multidrug-resistant (54)                                                            |                                                              | 0<br>0.0 | 27<br>50.0  | 20<br>87.0  | 4<br>94.4   | 0<br>94.4   | 0<br>94.4  | 1<br>96.3 | 0<br>96.3  | 0<br>96.3 | 0<br>96.3 | 2<br>100.0        | 0.12              | 0.5            |
| <i>Enterobacteriales</i> intrinsically resistant to colistin (102) <sup>c</sup>     |                                                              |          |             |             |             |             |            |           |            |           | 0<br>0.0  | 102<br>100.0      | >32               | >32            |
| <i>Acinetobacter baumannii</i> (264)                                                | 0<br>0.0                                                     | 1<br>0.4 | 23<br>9.1   | 112<br>51.5 | 94<br>87.1  | 27<br>97.3  | 1<br>97.7  | 1<br>98.1 | 0<br>98.1  | 2<br>98.9 | 2<br>99.6 | 1<br>100.0        | 0.25              | 1              |
| Meropenem-resistant (74)                                                            |                                                              | 0<br>0.0 | 6<br>8.1    | 36<br>56.8  | 26<br>91.9  | 3<br>95.9   | 0<br>95.9  | 0<br>95.9 | 0<br>95.9  | 1<br>97.3 | 1<br>98.6 | 1<br>100.0        | 0.25              | 0.5            |
| Colistin-non-resistant (258)                                                        | 0<br>0.0                                                     | 1<br>0.4 | 23<br>9.3   | 112<br>52.7 | 94<br>89.1  | 27<br>99.6  | 1<br>100.0 |           |            |           |           |                   | 0.25              | 1              |
| Colistin-resistant (6)                                                              |                                                              |          |             |             |             |             | 0<br>0.0   | 1<br>16.7 | 0<br>16.7  | 2<br>50.0 | 2<br>83.3 | 1<br>100.0        | 16                |                |
| Multidrug-resistant (104)                                                           |                                                              | 0<br>0.0 | 8<br>7.7    | 46<br>51.9  | 38<br>88.5  | 9<br>97.1   | 0<br>97.7  | 0<br>97.7 | 0<br>97.7  | 1<br>98.1 | 1<br>99.0 | 1<br>100.0        | 0.25              | 1              |
| <i>Pseudomonas aeruginosa</i> (263)                                                 |                                                              | 0<br>0.0 | 10<br>3.8   | 23<br>12.5  | 123<br>59.3 | 102<br>98.1 | 5<br>100.0 |           |            |           |           |                   | 0.5               | 1              |

| Species/organism group (no. of isolates) | No. and cumulative % of isolates inhibited at MIC (mg/L) of: |      |      |      |       |       |   |   |   |    |    | MIC <sub>50</sub> | MIC <sub>90</sub> |                |
|------------------------------------------|--------------------------------------------------------------|------|------|------|-------|-------|---|---|---|----|----|-------------------|-------------------|----------------|
|                                          | ≤0.03                                                        | 0.06 | 0.12 | 0.25 | 0.5   | 1     | 2 | 4 | 8 | 16 | 32 |                   |                   | > <sup>a</sup> |
| Meropenem-resistant (31)                 | 0                                                            | 2    | 5    | 15   | 9     |       |   |   |   |    |    |                   | 0.5               | 1              |
|                                          | 0.0                                                          | 6.5  | 22.6 | 71.0 | 100.0 |       |   |   |   |    |    |                   |                   |                |
| Multidrug-resistant (46)                 | 0                                                            | 4    | 7    | 17   | 16    | 2     |   |   |   |    |    |                   | 0.5               | 1              |
|                                          | 0.0                                                          | 8.7  | 23.9 | 60.9 | 95.7  | 100.0 |   |   |   |    |    |                   |                   |                |

2 Abbreviations: MIC, minimal inhibitory concentration.

3 <sup>a</sup> Greater than the highest concentration tested.

4 <sup>b</sup> Species included *Citrobacter amalonaticus/farmeri* (1), *Citrobacter freundii* (1), *C. freundii* species complex (26), *Citrobacter koseri* (19), *Enterobacter asburiae* (1), *Enterobacter*  
5 *cloacae* (14), *E. cloacae* species complex (36), *Enterobacter hormaechei* (1), *Escherichia coli* (261), *Klebsiella aerogenes* (23), *Klebsiella oxytoca* (37), and *Klebsiella pneumoniae*  
6 (265).

7 <sup>c</sup> Species included *Morganella morganii* (10), *Proteus mirabilis* (46), *Proteus penneri* (1), *Proteus vulgaris* group (5), *Providencia rettgeri* (7), *Providencia stuartii* (8), *Serratia*  
8 *liquefaciens* complex (3), and *Serratia marcescens* (22).

9 **TABLE S2** Cumulative MIC distributions for polymyxin B tested against the main species and organism groups

| Species/organism group (no. of isolates)                                           | No. and cumulative % of isolates inhibited at MIC (mg/L) of: |             |             |             |             |            |           |            |            |           |              | MIC <sub>50</sub> | MIC <sub>90</sub> |  |
|------------------------------------------------------------------------------------|--------------------------------------------------------------|-------------|-------------|-------------|-------------|------------|-----------|------------|------------|-----------|--------------|-------------------|-------------------|--|
|                                                                                    | ≤0.06                                                        | 0.12        | 0.25        | 0.5         | 1           | 2          | 4         | 8          | 16         | 32        | > a          |                   |                   |  |
| <i>Enterobacterales</i> (787)                                                      |                                                              |             |             |             |             |            |           |            |            |           |              |                   |                   |  |
| <i>Enterobacterales</i> not intrinsically resistant to colistin (685) <sup>b</sup> | 0<br>0.0                                                     | 112<br>16.4 | 459<br>83.4 | 90<br>96.5  | 7<br>97.5   | 1<br>97.7  | 2<br>98.0 | 3<br>98.4  | 1<br>98.5  | 2<br>98.8 | 8<br>100.0   | 0.25              | 0.5               |  |
| <i>Citrobacter</i> spp. (47)                                                       | 0<br>0.0                                                     | 13<br>27.7  | 30<br>91.5  | 4<br>100.0  |             |            |           |            |            |           |              | 0.25              | 0.25              |  |
| <i>Enterobacter cloacae</i> species complex (52)                                   | 0<br>0.0                                                     | 12<br>23.1  | 27<br>75.0  | 3<br>80.8   | 0<br>80.8   | 0<br>80.8  | 0<br>80.8 | 1<br>82.7  | 0<br>82.7  | 2<br>86.5 | 7<br>100.0   | 0.25              | >32               |  |
| <i>Escherichia coli</i> (261)                                                      | 0<br>0.0                                                     | 53<br>20.3  | 170<br>85.4 | 33<br>98.1  | 3<br>99.2   | 1<br>99.6  | 0<br>99.6 | 1<br>100.0 |            |           |              | 0.25              | 0.5               |  |
| <i>Klebsiella aerogenes</i> (23)                                                   | 0<br>0.0                                                     | 7<br>30.4   | 14<br>91.3  | 2<br>100.0  |             |            |           |            |            |           |              | 0.25              | 0.25              |  |
| <i>Klebsiella oxytoca</i> (37)                                                     | 0<br>0.0                                                     | 8<br>21.6   | 28<br>97.3  | 0<br>97.3   | 1<br>100.0  |            |           |            |            |           |              | 0.25              | 0.25              |  |
| <i>Klebsiella pneumoniae</i> (265)                                                 | 0<br>0.0                                                     | 19<br>7.2   | 190<br>78.9 | 48<br>97.0  | 3<br>98.1   | 0<br>98.1  | 2<br>98.9 | 1<br>99.2  | 1<br>99.6  | 0<br>99.6 | 1<br>100.0   | 0.25              | 0.5               |  |
| Colistin-resistant (17)                                                            |                                                              |             |             |             | 0<br>0.0    | 1<br>5.9   | 2<br>17.6 | 3<br>35.3  | 1<br>41.2  | 2<br>52.9 | 8<br>100.0   | 32                | >32               |  |
| Meropenem-resistant (10)                                                           | 0<br>0.0                                                     | 2<br>20.0   | 4<br>60.0   | 1<br>70.0   | 0<br>70.0   | 0<br>70.0  | 1<br>80.0 | 0<br>80.0  | 1<br>90.0  | 0<br>90.0 | 1<br>100.0   | 0.25              | 16                |  |
| Multidrug-resistant (54)                                                           | 0<br>0.0                                                     | 6<br>11.1   | 37<br>79.6  | 8<br>94.4   | 0<br>94.4   | 0<br>94.4  | 1<br>96.3 | 0<br>96.3  | 1<br>98.1  | 0<br>98.1 | 1<br>100.0   | 0.25              | 0.5               |  |
| <i>Enterobacterales</i> intrinsically resistant to colistin (102) <sup>c</sup>     |                                                              |             |             |             |             |            |           |            | 0<br>0.0   | 1<br>1.0  | 101<br>100.0 | >32               | >32               |  |
| <i>Acinetobacter baumannii</i> (264)                                               | 0<br>0.0                                                     | 34<br>12.9  | 148<br>68.9 | 66<br>93.9  | 11<br>98.1  | 1<br>98.5  | 0<br>98.5 | 3<br>99.6  | 1<br>100.0 |           |              | 0.25              | 0.5               |  |
| Meropenem-resistant (74)                                                           | 0<br>0.0                                                     | 12<br>16.2  | 41<br>71.6  | 17<br>94.6  | 1<br>95.9   | 1<br>97.3  | 0<br>97.3 | 1<br>98.6  | 1<br>100.0 |           |              | 0.25              | 0.5               |  |
| Colistin-non-resistant (258)                                                       | 0<br>0.0                                                     | 34<br>13.2  | 148<br>70.5 | 66<br>96.1  | 10<br>100.0 |            |           |            |            |           |              | 0.25              | 0.5               |  |
| Colistin-resistant (6)                                                             |                                                              |             |             | 0<br>0.0    | 1<br>16.7   | 1<br>33.3  | 0<br>33.3 | 3<br>83.3  | 1<br>100.0 |           |              | 8                 |                   |  |
| Multidrug-resistant (104)                                                          | 0<br>0.0                                                     | 15<br>14.4  | 59<br>71.2  | 25<br>95.2  | 2<br>97.1   | 1<br>98.1  | 0<br>98.1 | 1<br>99.0  | 1<br>100.0 |           |              | 0.25              | 0.5               |  |
| <i>Pseudomonas aeruginosa</i> (263)                                                | 0<br>0.0                                                     | 5<br>1.9    | 31<br>13.7  | 171<br>78.7 | 52<br>98.5  | 4<br>100.0 |           |            |            |           |              | 0.5               | 1                 |  |

| Species/organism group (no. of isolates) | No. and cumulative % of isolates inhibited at MIC (mg/L) of: |          |           |            |            |            |   |   |    |    |                | MIC <sub>50</sub> | MIC <sub>90</sub> |
|------------------------------------------|--------------------------------------------------------------|----------|-----------|------------|------------|------------|---|---|----|----|----------------|-------------------|-------------------|
|                                          | ≤0.06                                                        | 0.12     | 0.25      | 0.5        | 1          | 2          | 4 | 8 | 16 | 32 | > <sup>a</sup> |                   |                   |
| Meropenem-resistant (31)                 | 0<br>0.0                                                     | 2<br>6.5 | 6<br>25.8 | 21<br>93.5 | 2<br>100.0 |            |   |   |    |    |                | 0.5               | 0.5               |
| Multidrug-resistant (46)                 | 0<br>0.0                                                     | 3<br>6.5 | 8<br>23.9 | 26<br>80.4 | 8<br>97.8  | 1<br>100.0 |   |   |    |    |                | 0.5               | 1                 |

10 Abbreviations: MIC, minimal inhibitory concentration.

11 <sup>a</sup> Greater than the highest concentration tested.

12 <sup>b</sup> Species included *Citrobacter amalonaticus/farmeri* (1), *Citrobacter freundii* (1), *C. freundii* species complex (26), *Citrobacter koseri* (19), *Enterobacter asburiae* (1), *Enterobacter*  
13 *cloacae* (14), *E. cloacae* species complex (36), *Enterobacter hormaechei* (1), *Escherichia coli* (261), *Klebsiella aerogenes* (23), *Klebsiella oxytoca* (37), and *Klebsiella pneumoniae*  
14 (265).

15 <sup>c</sup> Species included *Morganella morganii* (10), *Proteus mirabilis* (46), *Proteus penneri* (1), *Proteus vulgaris* group (5), *Providencia rettgeri* (7), *Providencia stuartii* (8), *Serratia*  
16 *liquefaciens* complex (3), and *Serratia marcescens* (22).

17 **TABLE S3** Antimicrobial activity of MRX-8 and comparator agents tested against 47 *Citrobacter* spp. isolates

| Antimicrobial agent                    | No. of isolates | mg/L              |                   |               | CLSI <sup>a</sup>  |       |      | EUCAST <sup>a</sup> |     |      |
|----------------------------------------|-----------------|-------------------|-------------------|---------------|--------------------|-------|------|---------------------|-----|------|
|                                        |                 | MIC <sub>50</sub> | MIC <sub>90</sub> | MIC range     | %S                 | %I    | %R   | %S                  | %I  | %R   |
| MRX-8                                  | 47              | 0.12              | 0.25              | 0.06 to 0.5   |                    |       |      |                     |     |      |
| Colistin                               | 47              | 0.12              | 0.25              | 0.12 to 0.5   |                    | 100.0 | 0.0  | 100.0               |     | 0.0  |
| Polymyxin B                            | 47              | 0.25              | 0.25              | 0.12 to 0.5   |                    | 100.0 | 0.0  |                     |     |      |
| Amikacin                               | 47              | 2                 | 4                 | 0.5 to 16     | 100.0              | 0.0   | 0.0  | 97.9 <sup>b</sup>   |     | 2.1  |
| Ceftazidime                            | 47              | 0.25              | >32               | 0.06 to >32   | 85.1               | 0.0   | 14.9 | 83.0                | 2.1 | 14.9 |
| Ceftazidime-avibactam (fixed 4 mg/L)   | 13              | 0.12              | 0.5               | ≤0.015 to 0.5 | 100.0              |       | 0.0  | 100.0               |     | 0.0  |
| Ceftriaxone                            | 47              | 0.12              | >8                | ≤0.06 to >8   | 83.0               | 2.1   | 14.9 | 83.0 <sup>c</sup>   |     | 17.0 |
|                                        |                 |                   |                   |               |                    |       |      | 83.0 <sup>d</sup>   | 2.1 | 14.9 |
| Gentamicin                             | 47              | 0.5               | 8                 | ≤0.12 to >16  | 89.4               | 2.1   | 8.5  | 87.2 <sup>b</sup>   |     | 12.8 |
| Levofloxacin                           | 47              | ≤0.03             | 2                 | ≤0.03 to >32  | 85.1               | 4.3   | 10.6 | 85.1                | 4.3 | 10.6 |
| Meropenem                              | 47              | 0.03              | 0.06              | 0.015 to 16   | 95.7               | 0.0   | 4.3  | 95.7 <sup>c</sup>   |     | 4.3  |
|                                        |                 |                   |                   |               |                    |       |      | 95.7 <sup>d</sup>   | 2.1 | 2.1  |
| Piperacillin-tazobactam (fixed 4 mg/L) | 47              | 2                 | 128               | 0.25 to >128  | 87.2               | 2.1   | 10.6 | 85.1                |     | 14.9 |
| Tigecycline                            | 47              | 0.25              | 0.5               | ≤0.06 to 1    | 100.0 <sup>e</sup> | 0.0   | 0.0  |                     |     |      |

18 Abbreviations: CLSI, Clinical and Laboratory Standards Institute; EUCAST, European Committee on Antimicrobial Susceptibility Testing; I, intermediate; MIC, minimal inhibitory  
 19 concentration; R, resistant; S, susceptible.

20 <sup>a</sup> Criteria as published by CLSI (2021) and EUCAST (2021).

21 <sup>b</sup> For infections originating from the urinary tract. For systemic infections, aminoglycosides must be used in combination with other active therapy.

22 <sup>c</sup> Using meningitis breakpoints.

23 <sup>d</sup> Using non-meningitis breakpoints.

24 <sup>e</sup> Using FDA breakpoints.

25 Organisms included *Citrobacter amalonaticus/farmeri* (1), *Citrobacter freundii* (1), *C. freundii* species complex (26), and *Citrobacter koseri* (19).

26 **TABLE S4** Antimicrobial activity of MRX-8 and comparator agents tested against 52 *Enterobacter cloacae* species  
 27 complex isolates

| Antimicrobial agent                    | No. of isolates | mg/L              |                   |              | CLSI <sup>a</sup> |      |      | EUCAST <sup>a</sup> |     |      |
|----------------------------------------|-----------------|-------------------|-------------------|--------------|-------------------|------|------|---------------------|-----|------|
|                                        |                 | MIC <sub>50</sub> | MIC <sub>90</sub> | MIC range    | %S                | %I   | %R   | %S                  | %I  | %R   |
| MRX-8                                  | 52              | 0.12              | >32               | 0.06 to >32  |                   |      |      |                     |     |      |
| Colistin                               | 52              | 0.12              | >32               | 0.06 to >32  |                   | 80.8 | 19.2 | 80.8                |     | 19.2 |
| Polymyxin B                            | 52              | 0.25              | >32               | 0.12 to >32  |                   | 80.8 | 19.2 |                     |     |      |
| Amikacin                               | 52              | 1                 | 2                 | 0.5 to 4     | 100.0             | 0.0  | 0.0  | 100.0 <sup>b</sup>  |     | 0.0  |
| Ceftazidime                            | 52              | 0.5               | >32               | 0.12 to >32  | 69.2              | 1.9  | 28.8 | 63.5                | 5.8 | 30.8 |
| Ceftazidime-avibactam (fixed 4 mg/L)   | 23              | 0.5               | 1                 | 0.06 to 2    | 100.0             |      | 0.0  | 100.0               |     | 0.0  |
| Ceftriaxone                            | 52              | 0.5               | >8                | ≤0.06 to >8  | 65.4              | 1.9  | 32.7 | 65.4 <sup>c</sup>   |     | 34.6 |
|                                        |                 |                   |                   |              |                   |      |      | 65.4 <sup>d</sup>   | 1.9 | 32.7 |
| Gentamicin                             | 52              | 0.25              | 0.5               | ≤0.12 to 16  | 98.1              | 0.0  | 1.9  | 98.1 <sup>b</sup>   |     | 1.9  |
| Levofloxacin                           | 51              | ≤0.03             | 4                 | ≤0.03 to >32 | 84.3              | 0.0  | 15.7 | 84.3                | 0.0 | 15.7 |
| Meropenem                              | 52              | 0.03              | 0.25              | 0.015 to 4   | 98.1              | 0.0  | 1.9  | 98.1 <sup>c</sup>   |     | 1.9  |
|                                        |                 |                   |                   |              |                   |      |      | 98.1 <sup>d</sup>   | 1.9 | 0.0  |
| Piperacillin-tazobactam (fixed 4 mg/L) | 52              | 4                 | >128              | 0.5 to >128  | 73.1              | 1.9  | 25.0 | 69.2                |     | 30.8 |
| Tigecycline                            | 52              | 0.5               | 1                 | 0.12 to 4    | 94.2 <sup>e</sup> | 5.8  | 0.0  |                     |     |      |

28 Abbreviations: CLSI, Clinical and Laboratory Standards Institute; EUCAST, European Committee on Antimicrobial Susceptibility Testing; I, intermediate; MIC, minimal inhibitory  
 29 concentration; R, resistant; S, susceptible.

30 <sup>a</sup> Criteria as published by CLSI (2021) and EUCAST (2021).

31 <sup>b</sup> For infections originating from the urinary tract. For systemic infections, aminoglycosides must be used in combination with other active therapy.

32 <sup>c</sup> Using meningitis breakpoints.

33 <sup>d</sup> Using non-meningitis breakpoints.

34 <sup>e</sup> Using FDA breakpoints.

35 Organisms included *Enterobacter asburiae* (1), *Enterobacter cloacae* (14), *E. cloacae* species complex (36), and *Enterobacter hormaechei* (1).



36 **TABLE S5** Antimicrobial activity of MRX-8 and comparator agents tested against 23 *Klebsiella aerogenes* isolates

| Antimicrobial agent                    | No. of isolates | mg/L              |                   |               | CLSI <sup>a</sup>  |       |      | EUCAST <sup>a</sup> |     |      |
|----------------------------------------|-----------------|-------------------|-------------------|---------------|--------------------|-------|------|---------------------|-----|------|
|                                        |                 | MIC <sub>50</sub> | MIC <sub>90</sub> | MIC range     | %S                 | %I    | %R   | %S                  | %I  | %R   |
| MRX-8                                  | 23              | 0.12              | 0.25              | 0.06 to 0.5   |                    |       |      |                     |     |      |
| Colistin                               | 23              | 0.12              | 0.25              | 0.12 to 1     |                    | 100.0 | 0.0  | 100.0               |     | 0.0  |
| Polymyxin B                            | 23              | 0.25              | 0.25              | 0.12 to 0.5   |                    | 100.0 | 0.0  |                     |     |      |
| Amikacin                               | 23              | 2                 | 2                 | 0.5 to 4      | 100.0              | 0.0   | 0.0  | 100.0 <sup>b</sup>  |     | 0.0  |
| Ceftazidime                            | 23              | 0.25              | >32               | 0.12 to >32   | 78.3               | 0.0   | 21.7 | 78.3                | 0.0 | 21.7 |
| Ceftazidime-avibactam (fixed 4 mg/L)   | 10              | 0.12              | 0.25              | 0.06 to 0.5   | 100.0              |       | 0.0  | 100.0               |     | 0.0  |
| Ceftriaxone                            | 23              | 0.12              | >8                | ≤0.06 to >8   | 78.3               | 0.0   | 21.7 | 78.3 <sup>c</sup>   |     | 21.7 |
|                                        |                 |                   |                   |               |                    |       |      | 78.3 <sup>d</sup>   | 0.0 | 21.7 |
| Gentamicin                             | 23              | 0.25              | 0.5               | ≤0.12 to 0.5  | 100.0              | 0.0   | 0.0  | 100.0 <sup>b</sup>  |     | 0.0  |
| Levofloxacin                           | 23              | 0.06              | 0.12              | ≤0.03 to 0.25 | 100.0              | 0.0   | 0.0  | 100.0               | 0.0 | 0.0  |
| Meropenem                              | 23              | 0.03              | 0.06              | 0.03 to 0.12  | 100.0              | 0.0   | 0.0  | 100.0 <sup>c</sup>  |     | 0.0  |
|                                        |                 |                   |                   |               |                    |       |      | 100.0 <sup>d</sup>  | 0.0 | 0.0  |
| Piperacillin-tazobactam (fixed 4 mg/L) | 23              | 4                 | 32                | 1 to 128      | 78.3               | 17.4  | 4.3  | 78.3                |     | 21.7 |
| Tigecycline                            | 23              | 0.5               | 0.5               | 0.25 to 1     | 100.0 <sup>e</sup> | 0.0   | 0.0  |                     |     |      |

37 Abbreviations: CLSI, Clinical and Laboratory Standards Institute; EUCAST, European Committee on Antimicrobial Susceptibility Testing; I, intermediate; MIC, minimal inhibitory  
 38 concentration; R, resistant; S, susceptible.

39 <sup>a</sup> Criteria as published by CLSI (2021) and EUCAST (2021).

40 <sup>b</sup> For infections originating from the urinary tract. For systemic infections, aminoglycosides must be used in combination with other active therapy.

41 <sup>c</sup> Using meningitis breakpoints.

42 <sup>d</sup> Using non-meningitis breakpoints.

43 <sup>e</sup> Using FDA breakpoints.

44 **TABLE S6** Antimicrobial activity of MRX-8 and comparator agents tested against 37 *Klebsiella oxytoca* isolates

| Antimicrobial agent                    | No. of isolates | mg/L              |                   |               | CLSI <sup>a</sup>  |       |      | EUCAST <sup>a</sup> |     |      |
|----------------------------------------|-----------------|-------------------|-------------------|---------------|--------------------|-------|------|---------------------|-----|------|
|                                        |                 | MIC <sub>50</sub> | MIC <sub>90</sub> | MIC range     | %S                 | %I    | %R   | %S                  | %I  | %R   |
| MRX-8                                  | 37              | 0.12              | 0.12              | 0.06 to 0.25  |                    |       |      |                     |     |      |
| Colistin                               | 37              | 0.12              | 0.25              | 0.12 to 0.5   |                    | 100.0 | 0.0  | 100.0               |     | 0.0  |
| Polymyxin B                            | 37              | 0.25              | 0.25              | 0.12 to 1     |                    | 100.0 | 0.0  |                     |     |      |
| Amikacin                               | 37              | 1                 | 2                 | 0.5 to 4      | 100.0              | 0.0   | 0.0  | 100.0 <sup>b</sup>  |     | 0.0  |
| Ceftazidime                            | 37              | 0.12              | 1                 | 0.06 to 32    | 94.6               | 2.7   | 2.7  | 91.9                | 2.7 | 5.4  |
| Ceftazidime-avibactam (fixed 4 mg/L)   | 12              | 0.12              | 0.25              | 0.06 to 0.5   | 100.0              |       | 0.0  | 100.0               |     | 0.0  |
| Ceftriaxone                            | 37              | 0.12              | >8                | ≤0.06 to >8   | 78.4               | 2.7   | 18.9 | 78.4 <sup>c</sup>   |     | 21.6 |
|                                        |                 |                   |                   |               |                    |       |      | 78.4 <sup>d</sup>   | 2.7 | 18.9 |
| Gentamicin                             | 37              | 0.5               | 1                 | ≤0.12 to >16  | 91.9               | 0.0   | 8.1  | 91.9 <sup>b</sup>   |     | 8.1  |
| Levofloxacin                           | 37              | ≤0.03             | 0.12              | ≤0.03 to 0.5  | 100.0              | 0.0   | 0.0  | 100.0               | 0.0 | 0.0  |
| Meropenem                              | 37              | 0.03              | 0.03              | 0.015 to 0.06 | 100.0              | 0.0   | 0.0  | 100.0 <sup>c</sup>  |     | 0.0  |
|                                        |                 |                   |                   |               |                    |       |      | 100.0 <sup>d</sup>  | 0.0 | 0.0  |
| Piperacillin-tazobactam (fixed 4 mg/L) | 37              | 2                 | >128              | 0.5 to >128   | 83.8               | 2.7   | 13.5 | 83.8                |     | 16.2 |
| Tigecycline                            | 37              | 0.25              | 0.5               | 0.25 to 2     | 100.0 <sup>e</sup> | 0.0   | 0.0  |                     |     |      |

45 Abbreviations: CLSI, Clinical and Laboratory Standards Institute; EUCAST, European Committee on Antimicrobial Susceptibility Testing; I, intermediate; MIC, minimal inhibitory  
 46 concentration; R, resistant; S, susceptible.

47 <sup>a</sup> Criteria as published by CLSI (2021) and EUCAST (2021).

48 <sup>b</sup> For infections originating from the urinary tract. For systemic infections, aminoglycosides must be used in combination with other active therapy.

49 <sup>c</sup> Using meningitis breakpoints.

50 <sup>d</sup> Using non-meningitis breakpoints.

51 <sup>e</sup> Using FDA breakpoints.

52 **TABLE S7** Bacterial isolates by species and year

| Species or organism group                                                    | No. of isolates |      |      |      |
|------------------------------------------------------------------------------|-----------------|------|------|------|
|                                                                              | All years       | 2017 | 2019 | 2020 |
| <i>Enterobacterales</i>                                                      | 787             | 304  | 283  | 200  |
| <i>Enterobacterales</i> not intrinsically resistant to colistin <sup>a</sup> | 685             | 266  | 237  | 182  |
| <i>Citrobacter</i> spp.                                                      | 47              | 14   | 13   | 20   |
| <i>Enterobacter cloacae</i> species complex                                  | 52              | 22   | 23   | 7    |
| <i>Escherichia coli</i>                                                      | 261             | 101  | 77   | 83   |
| <i>Klebsiella aerogenes</i>                                                  | 23              | 12   | 10   | 1    |
| <i>Klebsiella oxytoca</i>                                                    | 37              | 15   | 12   | 10   |
| <i>Klebsiella pneumoniae</i>                                                 | 265             | 102  | 102  | 61   |
| Colistin-resistant                                                           | 17              | 9    | 5    | 3    |
| Meropenem-resistant                                                          | 10              | 5    | 3    | 2    |
| Multidrug-resistant                                                          | 54              | 21   | 18   | 15   |
| <i>Enterobacterales</i> intrinsically resistant to colistin <sup>b</sup>     | 102             | 38   | 46   | 18   |
| <i>Acinetobacter baumannii</i>                                               | 264             | 101  | 91   | 72   |
| Colistin-non-resistant                                                       | 258             | 98   | 89   | 71   |
| Colistin-resistant                                                           | 6               | 3    | 2    | 1    |
| Meropenem-resistant                                                          | 74              | 29   | 23   | 22   |
| Multidrug-resistant                                                          | 104             | 43   | 32   | 29   |
| <i>Pseudomonas aeruginosa</i>                                                | 263             | 101  | 92   | 70   |
| Meropenem-resistant                                                          | 31              | 12   | 8    | 11   |
| Multidrug-resistant                                                          | 46              | 19   | 15   | 12   |

53 <sup>a</sup> Species included *Citrobacter amalonaticus/farmeri* (1), *Citrobacter freundii* (1), *C. freundii* species complex (26), *Citrobacter koseri* (19), *Enterobacter asburiae* (1), *Enterobacter*  
54 *cloacae* (14), *E. cloacae* species complex (36), *Enterobacter hormaechei* (1), *Escherichia coli* (261), *Klebsiella aerogenes* (23), *Klebsiella oxytoca* (37), and *Klebsiella pneumoniae*  
55 (265).

56 <sup>b</sup> Species included *Morganella morganii* (10), *Proteus mirabilis* (46), *Proteus penneri* (1), *Proteus vulgaris* group (5), *Providencia rettgeri* (7), *Providencia stuartii* (8), *Serratia*  
57 *liquefaciens* complex (3), and *Serratia marcescens* (22).

58 **TABLE S8** Bacterial isolates by infection type

| Organism/organism group                                                       | Infection type |            |            |           |            |           | Total        |
|-------------------------------------------------------------------------------|----------------|------------|------------|-----------|------------|-----------|--------------|
|                                                                               | BSI            | PIHP       | SSSI       | IAI       | UTI        | Other     |              |
| <i>Enterobacteriales</i>                                                      | 129            | 120        | 109        | 38        | 373        | 18        | 787          |
| <i>Enterobacteriales</i> not intrinsically resistant to colistin <sup>a</sup> | 120            | 98         | 76         | 36        | 342        | 13        | 685          |
| <i>Citrobacter</i> spp.                                                       | 6              | 7          | 7          | 1         | 24         | 2         | 47           |
| <i>Enterobacter cloacae</i> species complex                                   | 4              | 7          | 18         | 2         | 19         | 2         | 52           |
| <i>Escherichia coli</i>                                                       | 50             | 16         | 14         | 19        | 162        | 0         | 261          |
| <i>Klebsiella aerogenes</i>                                                   | 4              | 6          | 4          | 1         | 8          | 0         | 23           |
| <i>Klebsiella oxytoca</i>                                                     | 7              | 9          | 9          | 0         | 12         | 0         | 37           |
| <i>Klebsiella pneumoniae</i>                                                  | 49             | 53         | 24         | 13        | 117        | 9         | 265          |
| Colistin-resistant                                                            | 2              | 3          | 5          | 0         | 7          | 0         | 17           |
| Meropenem-resistant                                                           | 0              | 5          | 1          | 0         | 4          | 0         | 10           |
| Multidrug-resistant                                                           | 7              | 15         | 5          | 3         | 24         | 0         | 54           |
| <i>Enterobacteriales</i> intrinsically resistant to colistin <sup>b</sup>     | 9              | 22         | 33         | 2         | 31         | 5         | 102          |
| <i>Acinetobacter baumannii</i>                                                | 30             | 134        | 66         | 3         | 21         | 10        | 264          |
| Colistin-non-resistant                                                        | 29             | 130        | 65         | 3         | 21         | 10        | 258          |
| Colistin-resistant                                                            | 1              | 4          | 1          | 0         | 0          | 0         | 6            |
| Meropenem-resistant                                                           | 4              | 46         | 19         | 0         | 3          | 2         | 74           |
| Multidrug-resistant                                                           | 8              | 64         | 24         | 0         | 6          | 2         | 104          |
| <i>Pseudomonas aeruginosa</i>                                                 | 20             | 144        | 49         | 11        | 33         | 6         | 263          |
| Meropenem-resistant                                                           | 1              | 22         | 3          | 1         | 4          | 0         | 31           |
| Multidrug-resistant                                                           | 2              | 32         | 4          | 0         | 8          | 0         | 46           |
| <b>Total</b>                                                                  | <b>179</b>     | <b>398</b> | <b>224</b> | <b>52</b> | <b>427</b> | <b>34</b> | <b>1,314</b> |

59 Abbreviations: BSI, bloodstream infection; PIHP, pneumonia in hospitalized patients; IAI, intra-abdominal infection; SSSI, skin and skin structure infection; UTI, urinary tract  
60 infection.

61 <sup>a</sup> Species included *Citrobacter amalonaticus/farmeri* (1), *Citrobacter freundii* (1), *C. freundii* species complex (26), *Citrobacter koseri* (19), *Enterobacter asburiae* (1), *Enterobacter*  
62 *cloacae* (14), *E. cloacae* species complex (36), *Enterobacter hormaechei* (1), *Escherichia coli* (261), *Klebsiella aerogenes* (23), *Klebsiella oxytoca* (37), and *Klebsiella pneumoniae*  
63 (265).

- 64 <sup>b</sup> Species included *Morganella morganii* (10), *Proteus mirabilis* (46), *Proteus penneri* (1), *Proteus vulgaris* group (5), *Providencia rettgeri* (7), *Providencia stuartii* (8), *Serratia*
- 65 *liquefaciens* complex (3), and *Serratia marcescens* (22).
